# Supplementary material for: A microRNA checkpoint for Ca2+ signaling and overload in acute pancreatitis
Source: PubMed Central journal article supplement — Mol Ther. 2022 Jan 22;30(4):1754–74. doi: 10.1016/j.ymthe.2022.01.033 (PMC9077382; doi:10.1016/j.ymthe.2022.01.033), 2022-01-22
Supplement: mmc1.pdf [file mmc1.pdf]

## **Supplemental Information**

### **A microRNA checkpoint for Ca<sup>2+</sup>**

#### **signaling and overload in acute pancreatitis**

**Wenya Du, Geng Liu, Na Shi, Dongmei Tang, Pawel E. Ferdek, Monika A. Jakubowska, Shiyu Liu, Xinyue Zhu, Jiayu Zhang, Linbo Yao, Xiongbo Sang, Sailan Zou, Tingting Liu, Rajarshi Mukherjee, David N. Criddle, Xiaofeng Zheng, Qing Xia, Per-Olof Berggren, Wendong Huang, Robert Sutton, Yan Tian, Wei Huang, and Xianghui Fu**

Figure S1

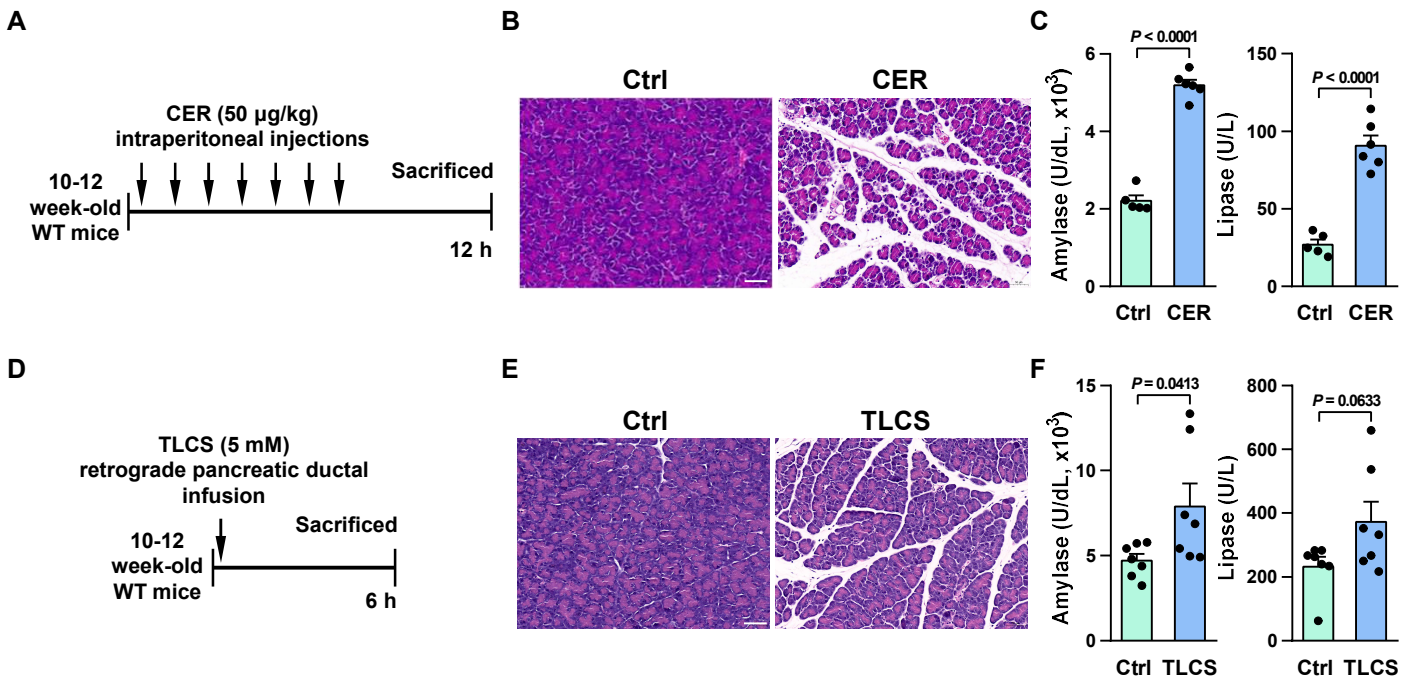

**Figure S1. Characterisation of murine AP models.**

(A-C) Schematic for CER-AP mouse model (A), representative images (*scale bar*, 50 µm, magnification  $\times 200$ ) of H&E stained pancreata (B), and levels of amylase/lipase (C) in CER-AP (50 µg/kg/h  $\times$  7 cerulein) at 12 h. (D-F) Schematic for TLCS-AP mouse model (D), representative images (*scale bar*, 50 µm, magnification  $\times 200$ ) of H&E stained pancreata (E), and levels of amylase/lipase (F) in TLCS (5 mM) at 6 h.

Data are from 5-7 mice per group, shown as mean  $\pm$  SEM.

## Figure S2

**A**

### Human *TRPC3* (NM\_003305) (3'UTR:1650 bp)

Binding Site 1 (67-74)

miR-26a 3' -UCGGAUAGGACC~~UAAUGAACUU~~-5'  
|||||  
*Trpc3* 3'UTR 5' -UUUCUAAGUAUGAAAUA~~CUUGAA~~-3'

### Mouse *Trpc3* (NM\_019510) (3'UTR:773 bp)

Binding Site 1 (67-74)

miR-26a 3' -UCGGAUAGGACC~~UAAUGAACUU~~-5'  
|||||  
*Trpc3* 3'UTR 5' -CUCCUAAGUAUGAAAUA~~CUUGAA~~-3'  
*Trpc3* mut 5' -CUCCUAAGUAUGAAAUA~~CUUG~~AG-3'

**B**

### Human *TRPC6* (NM\_004621) (3'UTR:1391 bp)

Binding Site 1(38-44)

miR-26a 3' -UCGGAUAGGACC~~UAAUGAACUU~~-5'  
|||||  
*Trpc6* 3'UTR 5' -CAUAUUUAAUUUGUCCACUUGAAG-3'

### Mouse *Trpc6* (NM\_013838) (3'UTR:1652 bp)

Binding Site 1(36-42)

miR-26a 3' -UCGGAUAGGACC~~UAAUGAACUU~~-5'  
|||||  
*Trpc6* 3'UTR 5' -CAUAUUUAAUUUCUCCACUUGAAG-3'  
*Trpc6* mut 5' -CUCCUAAGUAUGAAAUA~~CUUGG~~-3'

## Figure S2. The base sequence of TRPC gene mRNA and miR-26a sites.

(A) The base sequence of miR-26a, human (mRNA) *TRPC3*, mouse (mRNA) *Trpc3*, and mouse mutant (mRNA) *Trpc3* sites. (B) The base sequence of miR-26a, human (mRNA) *TRPC6*, mouse (mRNA) *Trpc6*, and mouse mutant (mRNA) *Trpc6* sites.

**Figure S3**

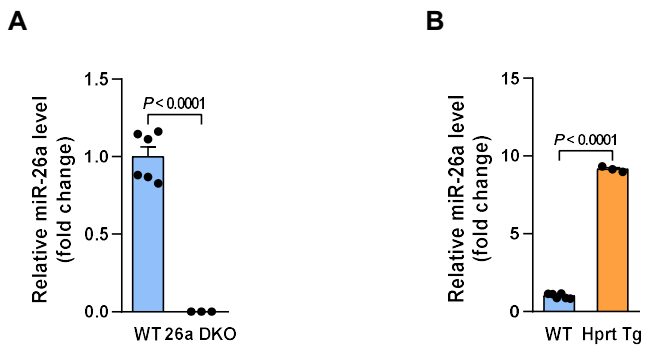

**Figure S3. Expression of miR-26a in 26a DKO and Hprt Tg PACs.**

(A and B) Expression of miR-26a in PACs of 26a DKO (A) and Hprt Tg (B) mice.

Data are shown as mean  $\pm$  SEM.

Figure S4

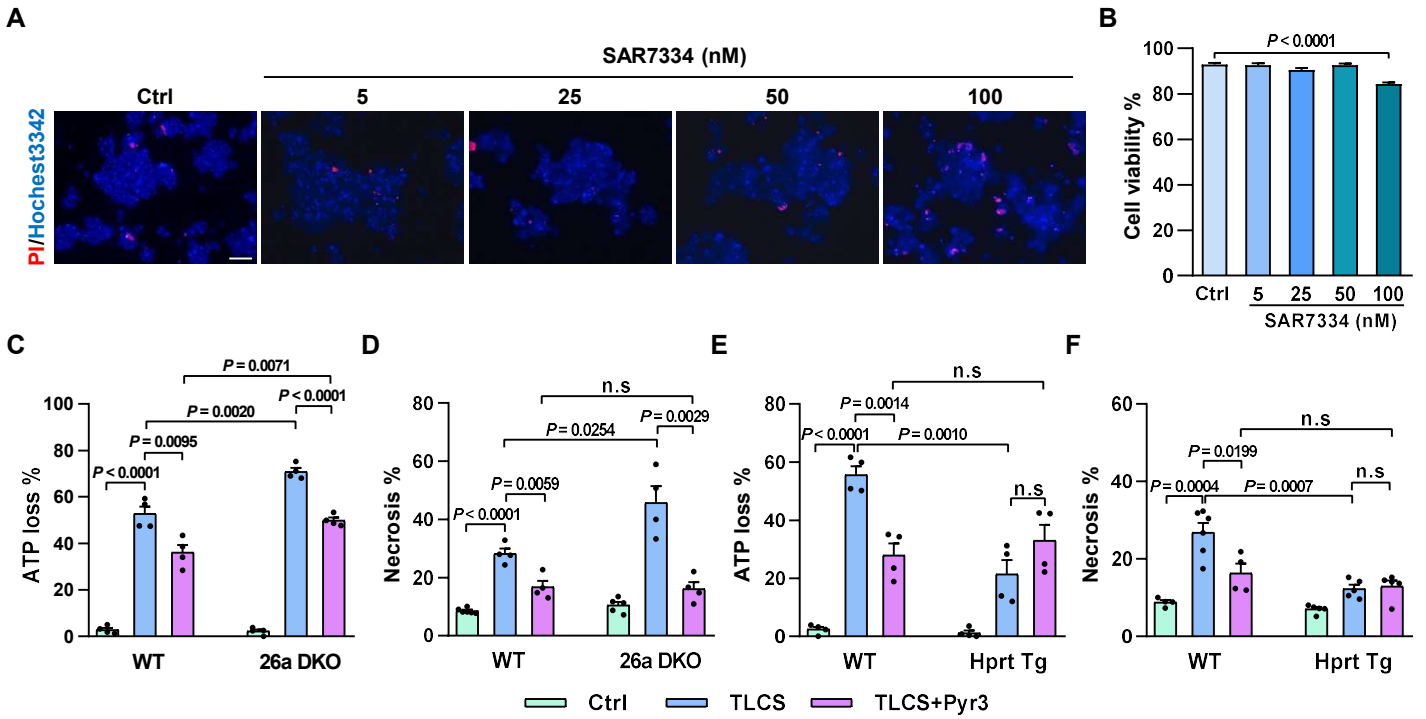

**Figure S4. Chemical inhibition of Trpc3 and Trpc6 recapitulates the effect of miR-26a on ATP loss, and necrosis in PACs.**

(A and B) Representative images of cell death (A), and percentage of cell viability (B) in PACs treated with different concentrations of SAR7334 (*scale bar*, 50  $\mu$ m, magnification  $\times$ 200). (C-F) ATP loss (C, E) and necrotic cell death pathway activation (D, F) determined in 26a DKO (C, D), Hprt Tg (E, F) PACs pre-treated with HEPES (Ctrl), TLCS, or TLCS plus Pyr3 in comparison with respective WT littermate PACs.

All experiments were from 3 or more independent repeats which yielded a sum of 30-40 cells per group. Data are shown as mean  $\pm$  SEM.

Figure S5

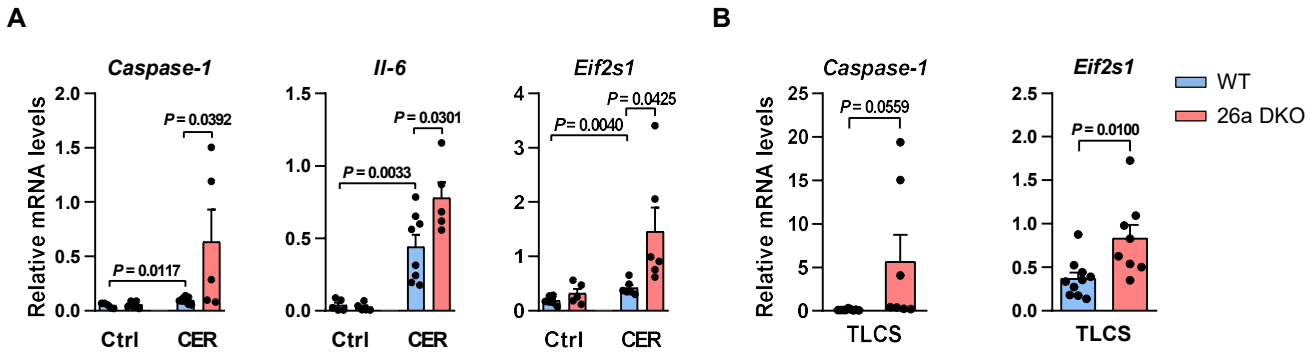

**Figure S5. MiR-26a knockdown affects mRNA levels indicative of inflammation and ER stress.**

(A) Expression of (mRNA) *Caspase-1*, *Il-6*, and *Eif2s1* in WT and DKO mice with CER-AP. (B) Expression of (mRNA) *Caspase-1*, *Il-6*, and *Eif2s1* in WT and DKO mice with TLCS-AP.

Data are from 5-9 mice per group, shown as mean  $\pm$  SEM.

Figure S6

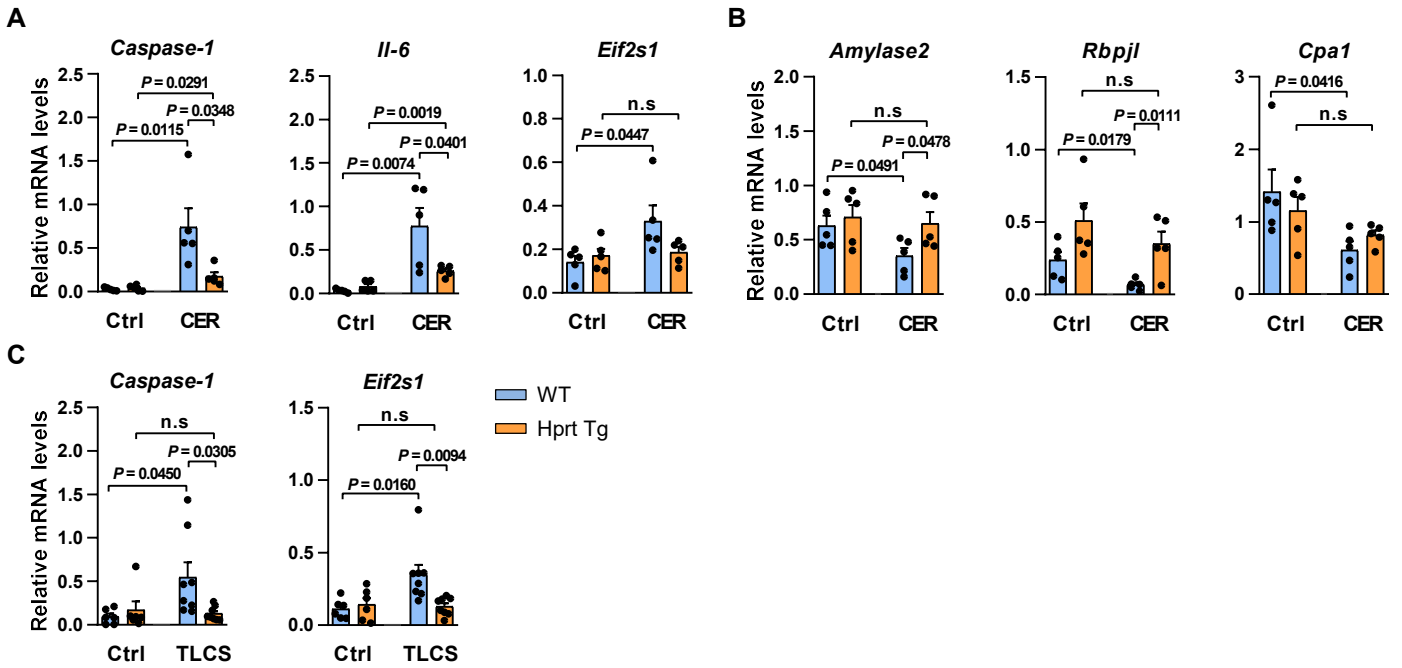

**Figure S6. MiR-26a overexpression affects mRNA levels of inflammation, ER stress and cell function genes.**

(A) Expression of (mRNA) *Caspase-1*, *Il-6*, and *Eif2s1* in WT and Hprt Tg mice with CER-AP. (B) Expression of (mRNA) *Amylase2*, *Rbpjl*, and *Cpa1* in WT and Hprt Tg mice with CER-AP. (C) Expression of (mRNA) *Caspase-1* and *Eif2s1* in WT and Hprt Tg mice with TLCS-AP.

Data are from 5-7 mice per group, shown as mean  $\pm$  SEM.

Figure S7

A

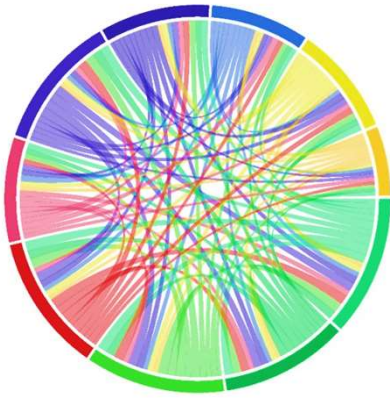

GO

- Cellular metabolic process
- Cellular macromolecule metabolic process
- Primary metabolic process
- Nitrogen compound metabolic process
- Positive regulation of biological process
- Macromolecule metabolic process
- Regulation of cellular metabolic process
- Positive regulation of cellular process
- Regulation of primary metabolic process
- Localisation

B

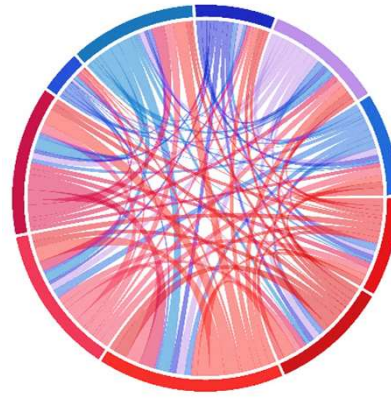

KEGG

- C-type lectin receptor signalling pathway
- AGE-RAGE signalling pathway in diabetic complications
- Pathways in cancer
- MAPK signalling pathway
- Proteoglycans in cancer
- Tight junction
- Focal adhesion
- Herpes simplex virus 1 infection
- Fluid shear stress and atherosclerosis
- Osteoclast differentiation

C

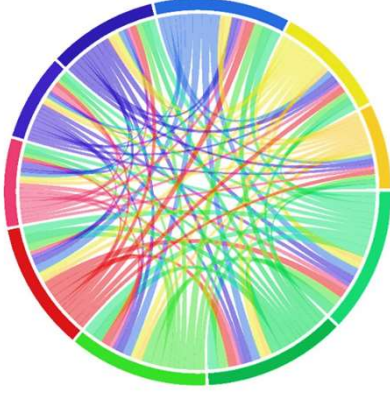

GO

- Cellular metabolic process
- Primary metabolic process
- Nitrogen compound metabolic process
- Cellular macromolecule metabolic process
- Cellular component organisation or biogenesis
- Cellular component organisation
- Regulation of cellular metabolic process
- Macromolecule metabolic process
- Regulation of metabolic process
- Negative regulation of cellular process

D

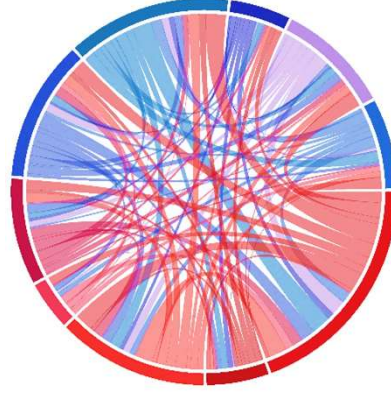

KEGG

- Pathways in cancer
- Tight junction
- MAPK signalling pathway
- Metabolic pathways
- Salmonella infection
- Fluid shear stress and atherosclerosis
- Proteoglycans in cancer
- Adherens junction
- AGE-RAGE signalling pathway in diabetic complications
- mTOR signalling pathway

E

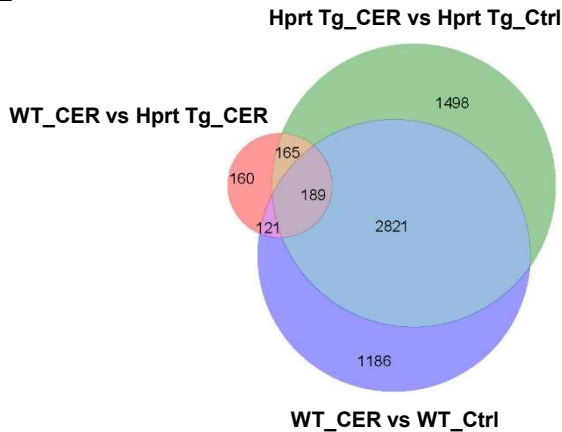

F

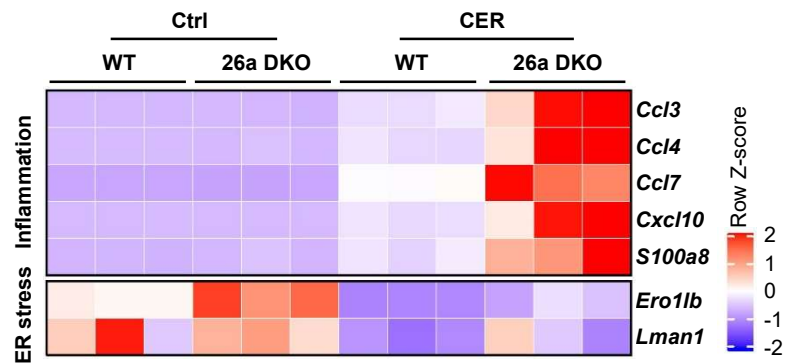



**Figure S7. MiR-26a ameliorates inflammation, autophagy, and ER stress in AP.**

(A and B) Chord diagram of top 10 GO-biological processes (A) and KEGG pathway analysis (B) of WT CER-AP (WT\_CER) versus WT control (WT\_Ctrl). (C and D) Chord diagram of top 10 GO-biological processes (C) and KEGG pathway analysis (D) of Hprt Tg CER-AP (Hprt Tg\_CER) versus Hprt Tg control (Hprt Tg\_Ctrl). (E) Venn diagram of differentially expressed genes compared between WT CER-AP versus WT control (WT\_CER vs WT\_Ctrl), Hprt Tg CER-AP versus Hprt Tg control (Hprt Tg\_CER vs Hprt Tg\_Ctrl) and WT CER-AP versus Hprt Tg CER-AP (WT\_CER vs Hprt Tg\_CER). (F) Heat map of expression of five inflammation-related genes and two ER stress-related genes in 26a DKO pancreata with CER-AP (7 injections) measured by qRT-PCR.

Figure S8

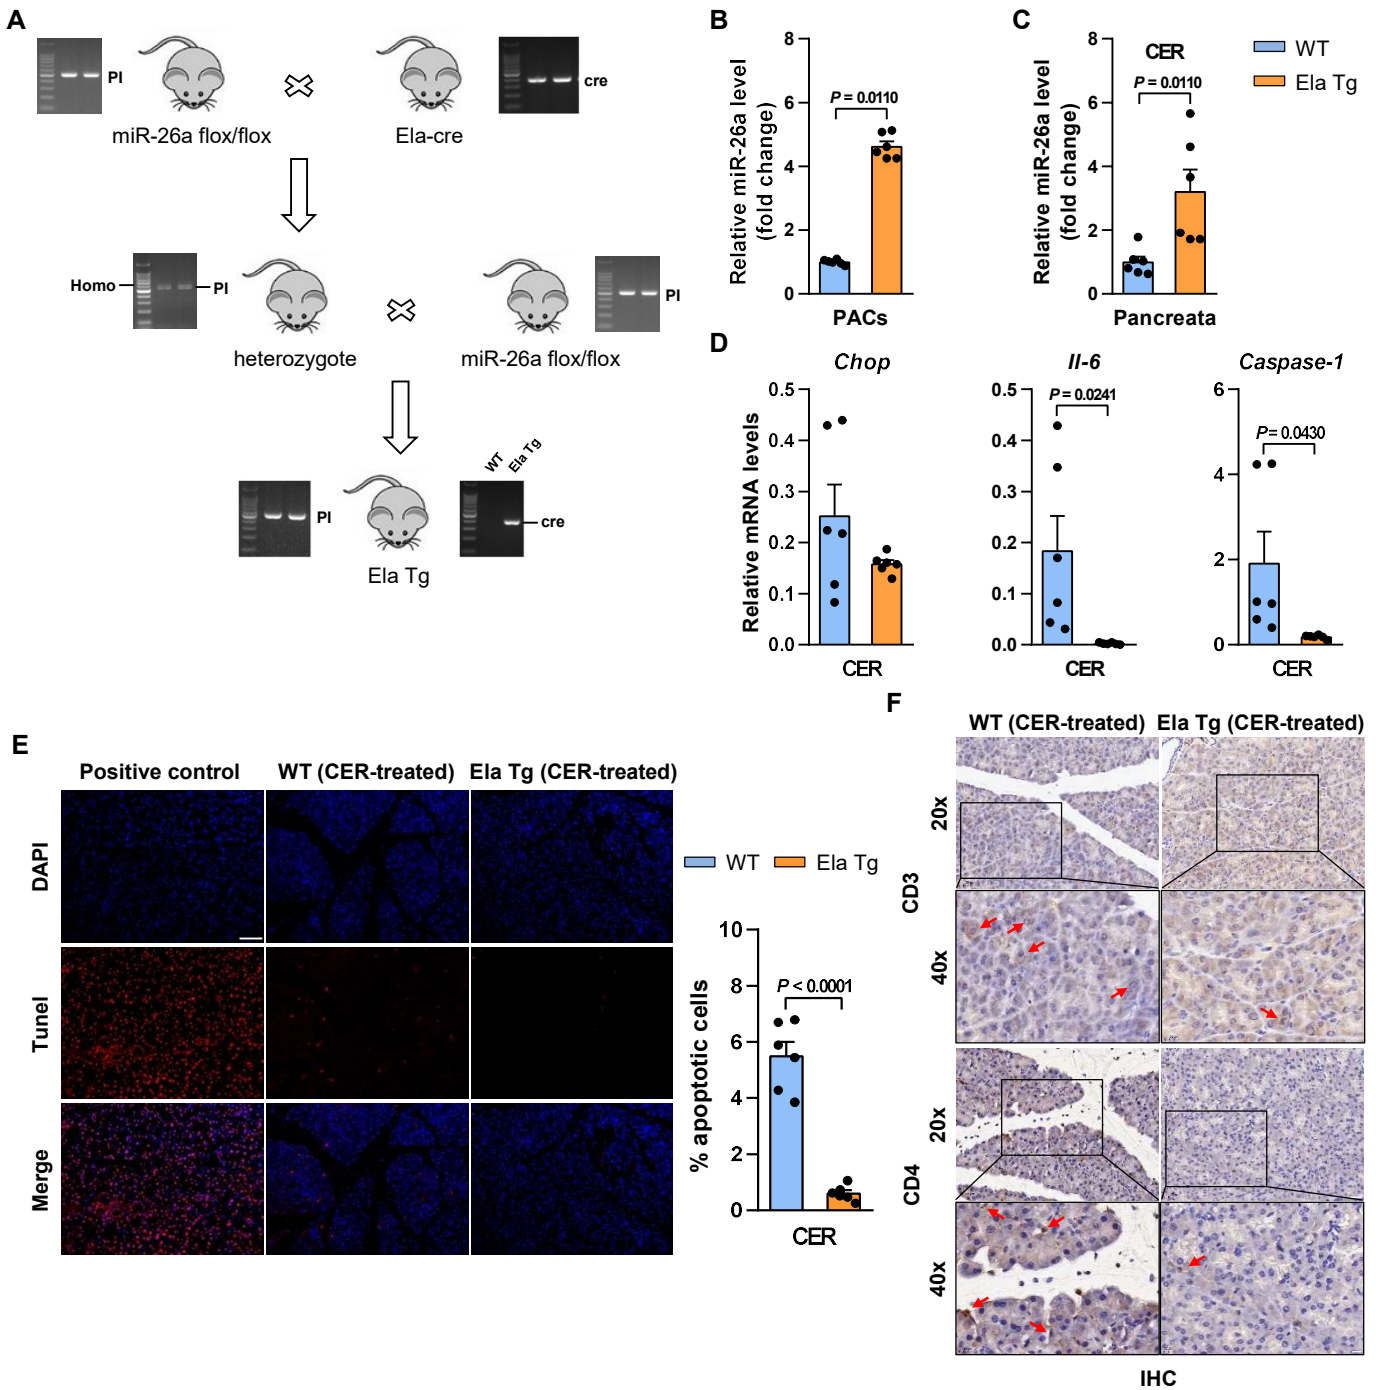

**Fig. S8. PAC specific miR-26a overexpression affects mRNA levels of oxidation, ER stress, and inflammation.**

(A) Schematic showing the generation of PAC-specific miR-26a overexpression (Ela Tg) mice. (B) Levels of miR-26a in PACs of PAC-specific miR-26a overexpression (Ela Tg) and WT mice induced with tamoxifen. (C) Levels of miR-26a in the pancreata of Ela Tg mice on CER-AP. (D) Expression of (mRNA) *Chop*, *Il-6* and *Caspase-1* in WT and Ela Tg mice with CER-AP (50  $\mu\text{g}/\text{kg}/\text{h} \times 7$  caerulein) at 12 h. (E) Representative images of TUNEL images in the pancreata from WT and Ela Tg mice with CER-AP. *Scale bars*, 50  $\mu\text{m}$ , magnification  $\times 200$ . The percentage of TUNEL positive staining cells was counted per five fields. (F) Representative immunohistochemical staining (*scale bar*, 50  $\mu\text{m}$ , magnification  $\times 200$ ) of CD3 and CD4 in WT and Ela Tg mice with CER-AP. Black outlines: higher magnifications of the indicated pancreata area in the low magnification images by black squares; High power view showing positive staining (red arrow). *scale bars*: 20  $\mu\text{m}$ , magnification  $\times 400$ . Data are from 6 mice per group, shown as mean  $\pm$  SEM.

**Figure S9**

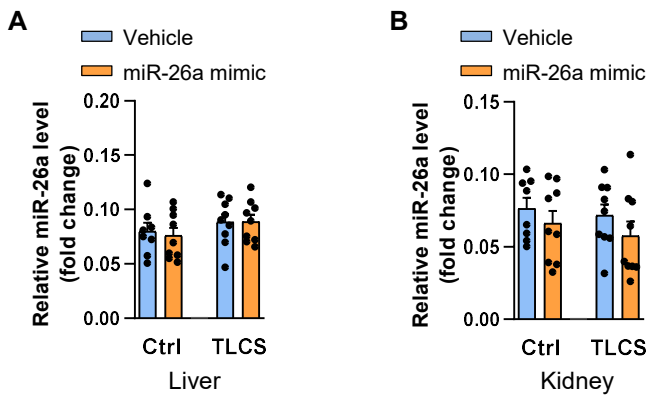

**Figure S9. Expression of miR-26a in the liver and kidney of TLCS-AP WT mice with pancreatic injection of miR-26a mimic.**

(A and B) Expression of miR-26a in the liver (A) and kidney (B) of TLCS-AP mice with or without administration of miR-26a mimic.

Data are from 8-9 mice per group, shown as mean  $\pm$  SEM.

Figure S10

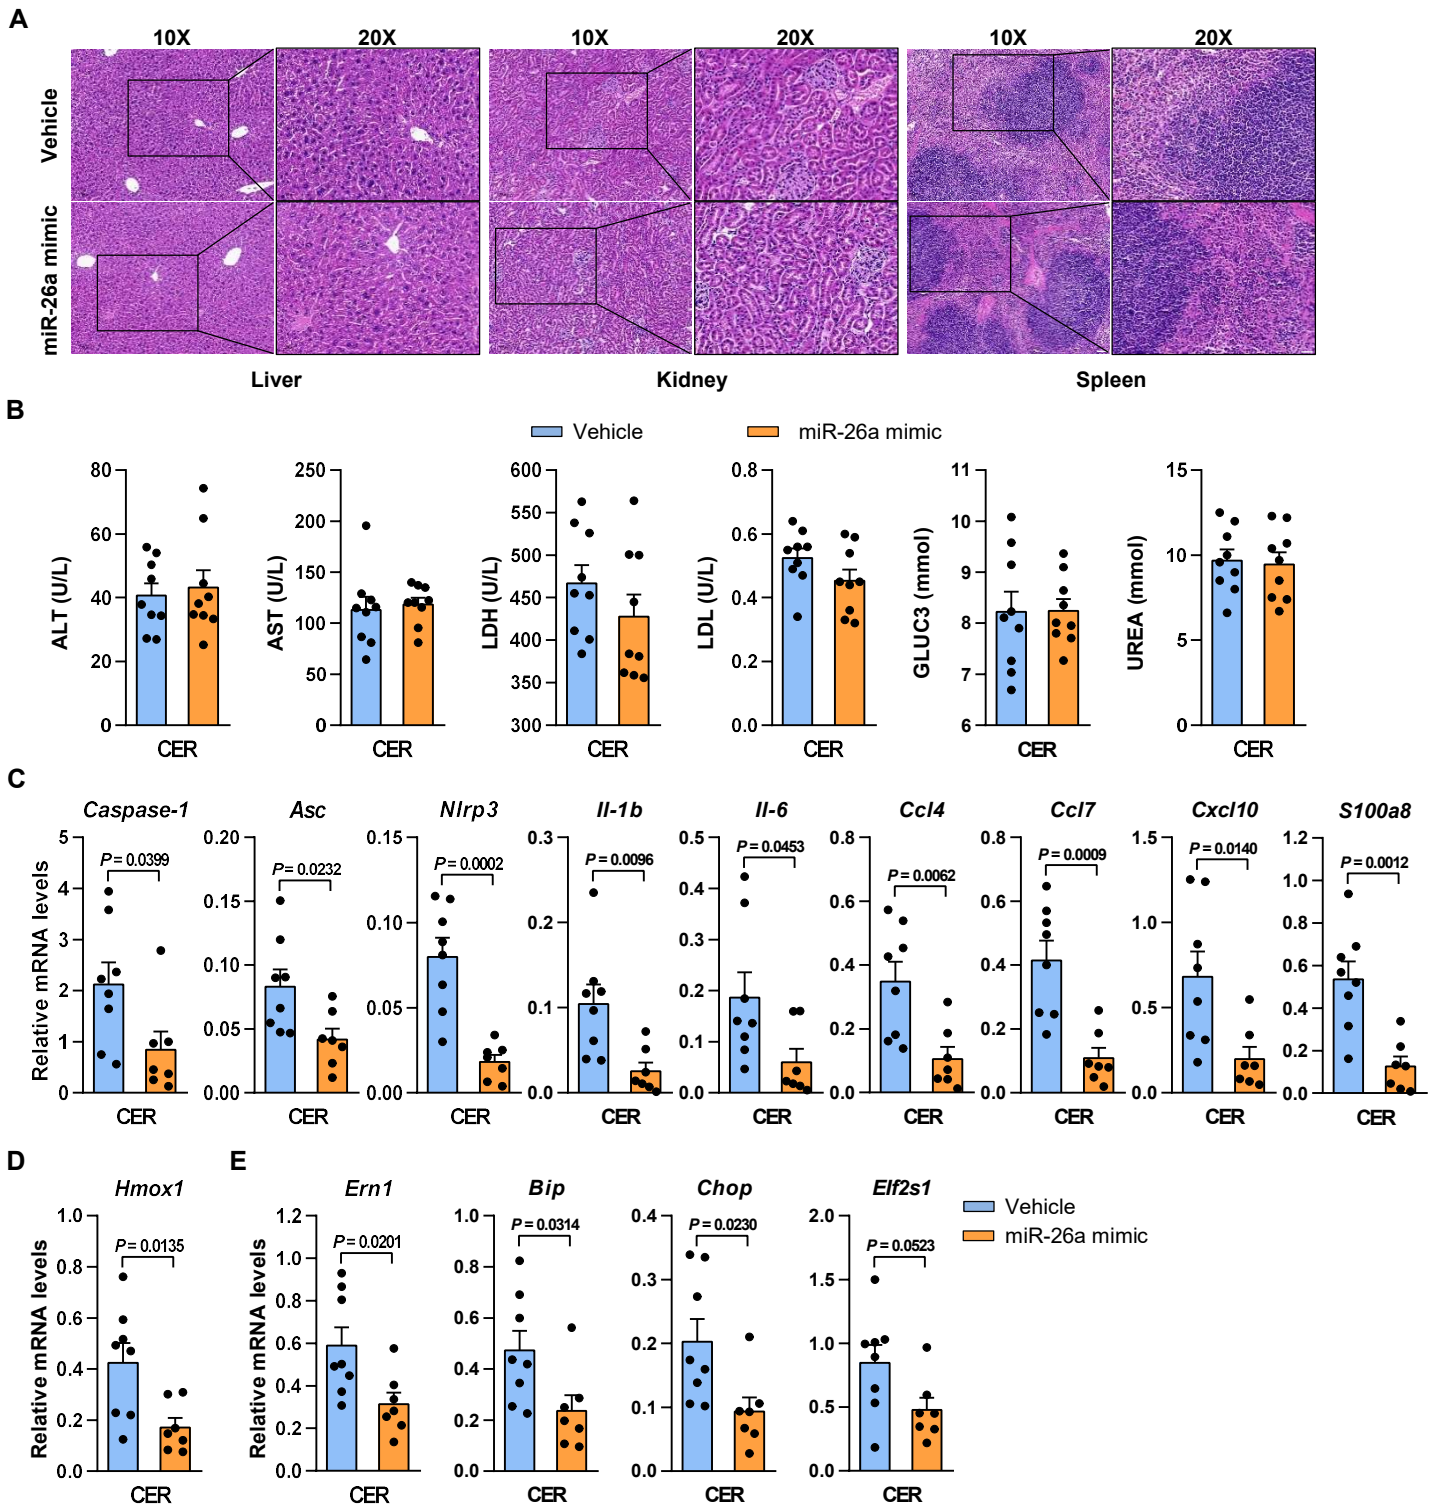

**Figure S10. Systemic administration of miR-26a mimic protects AP from inflammation, ER stress and oxidative stress.**

(A) Representative H&E staining in the liver, kidney and spleen of CER-AP mice injected with miR-26a mimic (*scale bar*, 100  $\mu\text{m}$ , magnification  $\times 100$ ). Black outlines: higher magnifications of the indicated tissue area in the low magnification images by black squares; *scale bars*: 50  $\mu\text{m}$ , magnification  $\times 200$ . (B) Clinical chemistry and hematological parameters (measures of ALT, AST, LDH, LDL, GLUT3 and UREA) from the serum of CER-AP WT mice injected with miR-26a mimic. (C) Expression of inflammation-related genes in the pancreata of CER-AP WT mice injected with miR-26a mimic. (D) Expression of oxidative stress-related genes in the pancreata of CER-AP WT mice injected with miR-26a mimic. (E) Expression of ER stress-related genes in the pancreata of CER-AP WT mice injected with miR-26a mimic. Data are from 7-8 mice per group, shown as mean  $\pm$  SEM.

**Table S1. TargetScan prediction of conserved miRNAs that target Ca<sup>2+</sup> channels and Ca<sup>2+</sup> regulator mRNAs.**

| <b>Name</b>       | <b>Human</b>                                                                     | <b>Mouse</b>                         |
|-------------------|----------------------------------------------------------------------------------|--------------------------------------|
| TRPC3             | miR-19<br><b>miR-26a</b><br>miR-130<br>miR-137/310/454<br>miR-218<br>miR-221/222 | <b>miR-26a</b><br>miR-137<br>miR-218 |
| TRPC6             | <b>miR-26a</b><br>miR-29<br>miR-135                                              | <b>miR-26a</b><br>miR-135            |
| ORAI1             | miR-7<br>miR-17/20/93/519<br>miR-183                                             | miR-7<br>miR-183                     |
| STIM1             | miR-223                                                                          | None                                 |
| SARAF<br>(TMEM66) | miR-199<br>miR-217                                                               | miR-199                              |

**Table S2. Characteristics of patients from whom pancreatic tissue samples were obtained**

| Sample ID | Type         | Gender | Age | BMI  | Smoker | Alcohol abuse | Indication for surgery       | Lesion region            | Sampling location  | Discharge diagnosis                                   |
|-----------|--------------|--------|-----|------|--------|---------------|------------------------------|--------------------------|--------------------|-------------------------------------------------------|
| AP-1      | Pancreatitis | Male   | 51  | 17.3 | Y      | N             | Infected pancreatic necrosis | Pancreatic body and tail | Pancreatic tail    | Severe acute pancreatitis                             |
| AP-2      | Pancreatitis | Male   | 55  | 19.8 | Y      | Y             | Infected pancreatic necrosis | Pancreatic head and tail | Pancreatic tail    | Severe acute pancreatitis                             |
| AP-3      | Pancreatitis | Male   | 34  | 27.0 | Y      | Y             | Pseudocyst                   | Pancreatic body and tail | Pancreatic tail    | Pancreatic pseudocyst                                 |
| AP-4      | Pancreatitis | Male   | 49  | 21.9 | N      | N             | Infected pancreatic necrosis | Pancreatic body          | Pancreatic tail    | Severe acute pancreatitis                             |
| AP-5      | Pancreatitis | Male   | 41  | 20.7 | Y      | Y             | Pseudocyst                   | Pancreatic head          | Pancreatic head    | Pancreatic pseudocyst                                 |
| AP-6      | Pancreatitis | Male   | 32  | 20.6 | N      | Y             | Infected pancreatic necrosis | Pancreatic body and tail | Pancreatic tail    | Severe acute pancreatitis                             |
| AP-7      | Pancreatitis | Male   | 39  | 20.1 | N      | N             | Portal hypertension          | Pancreatic body and tail | Pancreatic tail    | Pancreatic portal hypertension                        |
| AP-8      | Pancreatitis | Male   | 55  | 21.5 | Y      | N             | Pseudocyst                   | Pancreatic body and tail | Pancreatic tail    | Pancreatic pseudocyst                                 |
| AP-9      | Pancreatitis | Male   | 42  | 20.8 | Y      | N             | Pseudocyst                   | Pancreatic body and tail | Pancreatic tail    | Pancreatic pseudocyst                                 |
| AP-10     | Pancreatitis | Female | 62  | N/A  | N      | N             | Duodenal perforation         | Pancreatic head          | Pancreatic head    | Duodenal perforation                                  |
| NC-1      | Normal       | Male   | 64  | 24.4 | Y      | Y             | Space-occupying lesion       | Pancreatic body and tail | Upstream of lesion | Pancreatic adenocarcinoma                             |
| NC-2      | Normal       | Female | 57  | 23.9 | N      | N             | Space-occupying lesion       | Duodenum                 | Upstream of lesion | Gastrointestinal stromal tumor                        |
| NC-3      | Normal       | Male   | 45  | 26.4 | N      | N             | Space-occupying lesion       | Pancreatic head          | Upstream of lesion | Pancreatic adenocarcinoma                             |
| NC-4      | Normal       | Male   | 54  | 22.0 | Y      | Y             | Space-occupying lesion       | Pancreatic tail          | Upstream of lesion | Pancreatic lesion without confirmative adenocarcinoma |
| NC-5      | Normal       | Female | 65  | 23.9 | N      | N             | Space-occupying lesion       | Pancreatic tail          | Upstream of lesion | Pancreatic adenocarcinoma                             |
| NC-6      | Normal       | Female | 28  | 19.6 | N      | N             | Space-occupying lesion       | Pancreatic tail          | Upstream of lesion | Solid pseudopapillary neoplasm of pancreas            |
| NC-7      | Normal       | Male   | 67  | 23.3 | Y      | Y             | Space-occupying lesion       | Pancreatic head          | Upstream of lesion | Pancreatic adenocarcinoma                             |

BMI, body mass index; AP, acute pancreatitis; NC, normal control; Y, yes; N, no; N/A, not available.



**Table S3. Characteristics of patients with infected or sterile pancreatic necrosis from whom pancreatic tissue samples were obtained for miR-26a analysis**

| Sample ID | Comorbidity | Worst MCTSI | Necroma/Pseudocyst | % Necrosis | Indication for surgery       | Pancreatic infection | Extrapancreatic infection | Pancreatic pathology report                                             |
|-----------|-------------|-------------|--------------------|------------|------------------------------|----------------------|---------------------------|-------------------------------------------------------------------------|
| AP-1      | Y           | 10          | Y                  | > 50%      | Infected pancreatic necrosis | Y                    | N                         | Necrosis with suppurative inflammation                                  |
| AP-2      | N           | 10          | Y                  | > 50%      | Infected pancreatic necrosis | Y                    | N                         | Necrosis with suppurative inflammation                                  |
| AP-3      | Y           | 6           | Y                  | 0          | Pseudocyst                   | N                    | N                         | Consistent with necrotising pancreatitis and pseudocyst formation       |
| AP-4      | Y           | 10          | Y                  | > 50%      | Infected pancreatic necrosis | Y                    | N                         | Necrosis with suppurative inflammation                                  |
| AP-5      | N           | 8           | Y                  | ≤ 30%      | Pseudocyst                   | N                    | N                         | Necrotic tissue with chronic inflammatory cell infiltration             |
| AP-6      | Y           | 8           | Y                  | ≤ 30%      | Infected pancreatic necrosis | Y                    | N                         | Necrosis with suppurative inflammation                                  |
| AP-7      | N           | 4           | N                  | 0          | Portal hypertension          | N                    | N                         | Focal necrosis, calcification, chronic inflammation and fibrosis        |
| AP-8      | N           | 6           | Y                  | 0          | Pseudocyst                   | N                    | N                         | Consistent with acute necrotising pancreatitis and pseudocyst formation |
| AP-9      | Y           | 8           | Y                  | ≤ 30%      | Pseudocyst                   | N                    | N                         | Necrosis with foam cell aggregation                                     |
| AP-10     | N           | 4           | N                  | 0          | Duodenal perforation         | N                    | Y                         | Focal necrosis and calcification                                        |

MCTSI, modified computed tomography severity index; Y, yes; N, no.

**Table S4. Characteristics, complications, and outcomes of patients with AP from whom plasma samples are taken for miR-26a analysis.**

| <b>Patient variables</b>                  | <b>Total n = 85*</b> |
|-------------------------------------------|----------------------|
| <b>Characteristics</b>                    |                      |
| Age (years)†                              | 45 (36-52)           |
| Male                                      | 59 (69.4)            |
| Body mass index†                          | 26.6 (23.1-28.7)     |
| Smokers                                   | 32 (37.6)            |
| Alcohol history                           | 33 (38.8)            |
| Diabetes mellitus                         | 19 (22.4)            |
| Charlson comorbidity index score†         | 1 (0-1)              |
| Time from onset of pain to admission (h)† | 24 (13-34)           |
| <b>Aetiology</b>                          |                      |
| Hyperlipidaemia‡                          | 44 (51.8)            |
| Biliary                                   | 24 (28.2)            |
| Alcohol excess§                           | 6 (7.1)              |
| Other                                     | 11 (12.9)            |
| <b>Complications</b>                      |                      |
| Persistent organ failure                  | 44 (51.8)            |
| Respiratory                               | 44 (51.8)            |
| Circulatory                               | 2 (2.4)              |
| Renal                                     | 2 (2.4)              |
| Multiple system                           | 3 (3.5)              |
| Acute necrotic collection                 | 25 (29.4)            |
| Acute peripancreatic fluid collection     | 39 (45.9)            |
| Infection                                 | 29 (34.1)            |
| <b>Outcomes</b>                           |                      |
| Need for HDU/ICU                          | 5 (5.9)              |
| Necrosectomy                              | 3 (3.5)              |
| Mortality                                 | 1 (1.2)              |
| Length of hospital (days)†                | 11 (8-17)            |
| <b>Revised Atlanta Classification</b>     |                      |
| Mild                                      | 20 (23.5)            |
| Moderately severe                         | 23 (27.1)            |
| Severe                                    | 42 (49.4)            |

\*Values in parentheses are percentages unless indicated otherwise

†Values are medians (IQRs)

‡Serum triglyceride levels of  $\geq 11.3$  mmol/l on admission

§Drinking history > 35 standard drinks per week for > 5 years

HDU, high dependant unit; ICU, intensive care unit.

**Table S5. Genes locations highlighted in SOM.**

**Table S6. Different genes expressed in caerulein-treated WT and WT control mice.**

**Table S7. Different genes expressed in caerulein-treated Hprt Tg and Hprt Tg control mice.**

**Table S8. Different genes expressed in caerulein-treated Hprt Tg and WT mice.**

**Table S9. Differentially expressed genes indicative of chemotaxis and immune responses in pancreata of WT mice with or without CER-AP versus Hprt Tg mice with or without CER-AP**

| Gene name | WT3_NC fpkm | WT4_NC fpkm | WT5_NC fpkm | TG1_NC fpkm | TG4_NC fpkm | TG5_NC fpkm | WT1_CER fpkm | WT2_CER fpkm | WT3_CER fpkm | TG1_CER fpkm | TG2_CER fpkm | TG3_CER fpkm |
|-----------|-------------|-------------|-------------|-------------|-------------|-------------|--------------|--------------|--------------|--------------|--------------|--------------|
| Acod1     | 0           | 0           | 0.063498515 | 0           | 0.1594212   | 0.242492262 | 3.365555265  | 0.088129668  | 1.075709843  | 0.135283448  | 0.014925305  | 0.102527569  |
| Arg1      | 0.162489623 | 0.046075586 | 1.719390438 | 0.033108324 | 1.266872618 | 0.32116892  | 0.159767393  | 0.242092883  | 1.185586007  | 0.063707089  | 0.263570975  | 0.144845502  |
| Bbc3      | 1.704458008 | 1.111627737 | 1.097830724 | 0.83350673  | 1.107420038 | 0.935818626 | 5.999731986  | 4.788710546  | 3.222151186  | 2.338925975  | 1.843176814  | 2.785525386  |
| Ccl3      | 0           | 0           | 0           | 0           | 0.136475785 | 0           | 4.647020267  | 0.804748888  | 1.175595905  | 0.092649735  | 1.022169074  | 0.983033265  |
| Ccl4      | 0           | 0           | 0           | 0.22353135  | 0           | 0           | 4.314687909  | 1.75124332   | 1.45536398   | 0.322589531  | 0.474534249  | 1.629877664  |
| Ccl7      | 0.45196864  | 0.384480917 | 0.311903753 | 0.184183135 | 2.022942571 | 0.397039453 | 37.77371905  | 16.73847547  | 24.65806295  | 9.568947873  | 13.73394535  | 16.11564432  |
| Ccl2      | 0.73157857  | 0.948327067 | 1.378355269 | 0.795007574 | 1.187045159 | 1.346541424 | 6.001202755  | 5.220026277  | 3.373721929  | 1.994144673  | 1.687719962  | 3.188236447  |
| Cebpb     | 1.384078834 | 3.071501479 | 3.543757536 | 1.667567654 | 3.614430507 | 3.594738185 | 45.82060856  | 77.5158047   | 55.80266113  | 19.29960503  | 28.16442801  | 41.12623494  |
| Csf3      | 0           | 0           | 0           | 0           | 0           | 0           | 2.116120821  | 0.654392408  | 0.934708289  | 0.100452508  | 0.692658803  | 0.418715918  |
| Cxcl1     | 0           | 0.109500165 | 0.044415094 | 0.039341518 | 0.027877454 | 0           | 11.65656085  | 2.67122981   | 2.561440606  | 0.984113128  | 1.774758091  | 2.811212995  |
| Cxcl10    | 0           | 0.182338197 | 0           | 0.098266446 | 0.02321058  | 0           | 6.164524132  | 0.239512852  | 0.666449425  | 0.283626674  | 0.208609639  | 0.453789208  |
| Cxcl13    | 0           | 0           | 5.503609529 | 1.860169585 | 3.227118288 | 3.456832628 | 1.79528536   | 0.335020461  | 30.48671156  | 0.12342556   | 0.340426744  | 1.075719258  |
| Cxcl3     | 0           | 0           | 0.023807405 | 0           | 0.014942889 | 0.090917268 | 0.264579919  | 0.044056436  | 0.085811555  | 0            | 0.033575536  | 0.030752409  |
| Enpp2     | 0.156613117 | 0.444092425 | 0.720525195 | 0.931799659 | 4.504338544 | 2.325092304 | 4.34865889   | 0.400007126  | 4.97597734   | 0.4543829    | 0.501303269  | 1.200621079  |
| Fos       | 0.192403742 | 0.785635752 | 2.018224158 | 0.282265353 | 1.022291831 | 0.067608121 | 31.20719105  | 11.07333786  | 5.053862802  | 2.021670782  | 3.878288521  | 6.265881734  |
| Gadd45a   | 0.102615329 | 0.232780964 | 0.047209922 | 0.125451268 | 0.829686124 | 0.180288323 | 15.86088081  | 5.984407444  | 2.246161245  | 0.724180579  | 2.574429004  | 3.323509046  |
| Gbp5      | 0.068183457 | 0.061869161 | 0.125475821 | 0.077799822 | 0.189013925 | 0           | 3.518320169  | 0.359905965  | 1.031166057  | 0.267325963  | 0.129769423  | 0.364678067  |
| Gpre5b    | 0.254122541 | 0.266064117 | 0.557586904 | 0.223048561 | 1.625683049 | 0.635370317 | 1.952792335  | 0.765554315  | 1.996803388  | 0.383205706  | 0.820185816  | 0.975814446  |
| Ifi47     | 0.365979459 | 0.622663192 | 0.37042512  | 0.447424256 | 0.866590885 | 0.225050567 | 2.821209199  | 0.903593399  | 2.451843988  | 0.401769411  | 0.474918021  | 0.869971094  |
| Ikbke     | 0.260941975 | 0.409806008 | 0.517141818 | 0.613484245 | 0.65497178  | 0.396742268 | 0.63945225   | 0.529761785  | 0.632424883  | 0.236093469  | 0.334273544  | 0.256464449  |
| Ilib      | 0.094920525 | 0.269156804 | 0.436697966 | 0.077362712 | 0.246686966 | 0.083384531 | 6.271795953  | 2.060718411  | 4.218418669  | 0.260507539  | 1.375452575  | 2.087132279  |
| Itga2b    | 0.033189116 | 0.094111116 | 0.091615294 | 0.054099997 | 0.134173664 | 0.11662215  | 0.234958252  | 0.141281089  | 0.418277052  | 0.026024825  | 0.071780483  | 0.138064445  |
| Itgb2     | 2.431700872 | 3.935386429 | 5.129856092 | 3.552918023 | 4.3501433   | 3.542913651 | 4.19876248   | 3.559866827  | 6.550210838  | 1.25568926   | 3.578830955  | 2.11478229   |
| Itgb7     | 0           | 0.222360444 | 0.481029904 | 0.319561064 | 0.584973646 | 0.200920597 | 1.285060478  | 0.445081335  | 2.665759204  | 0.230587462  | 0.862127656  | 0.368928988  |
| Junb      | 1.416011268 | 1.338414667 | 2.967762178 | 1.282318046 | 2.08990038  | 2.487837824 | 195.6320001  | 148.7179268  | 70.70469403  | 36.20965839  | 37.3796258   | 88.54464473  |
| Lpl       | 2.634524687 | 6.338871351 | 4.649532995 | 5.554576989 | 15.99335216 | 3.710536035 | 3.016740181  | 2.485635679  | 6.800923659  | 1.774581079  | 1.546833105  | 2.304819369  |
| Mmp28     | 0.070087806 | 0.158992883 | 0.150477056 | 0.285616981 | 0.728598914 | 0.143662894 | 0.459424048  | 0.775718517  | 0.526883836  | 0.146555904  | 0.181900712  | 0.416514943  |
| Mmp9      | 0.076722283 | 0.522129214 | 0.564758194 | 0.291809788 | 1.01911432  | 0.3369899   | 0.603495483  | 0.239503184  | 0.865137602  | 0.320857629  | 0.221243716  | 0.182376817  |
| Padi2     | 6.2468233   | 6.081977314 | 7.97398464  | 6.886531368 | 3.493023268 | 5.582788143 | 6.859346756  | 6.88619755   | 3.688489801  | 2.435026498  | 1.522854524  | 3.154413145  |
| Rac2      | 0.175004938 | 0.231580675 | 0.268379962 | 1.117296566 | 1.549745657 | 0.743057481 | 0.940665927  | 0.744969765  | 4.043524562  | 0.45742634   | 0.89577324   | 0.589340232  |
| Rarres2   | 0.715602833 | 1.004919627 | 1.881286945 | 0.944285298 | 7.045459652 | 1.017787318 | 1.769087023  | 1.334531807  | 2.328116608  | 0.694733477  | 0.766472864  | 0.992286213  |
| Ripor2    | 0.108651525 | 0.035210566 | 0.035704983 | 0.177107673 | 0.19273021  | 0.04772338  | 0.177034657  | 0.09910998   | 0.427268258  | 0.018256653  | 0.137636091  | 0.106077615  |
| S100a8    | 0           | 0           | 0           | 0           | 0.301269313 | 0.229127235 | 4.923966605  | 1.33235803   | 8.131374401  | 0.102261811  | 2.03078778   | 1.472526362  |
| Saa3      | 0.034730131 | 0.236353964 | 1.118472975 | 0.084917896 | 1.564496399 | 1.311898492 | 10.90013348  | 1.981068805  | 16.86289923  | 0.626363402  | 2.05810566   | 2.435435005  |
| Selplg    | 0.08474412  | 0.216270516 | 0.331397738 | 0.293541872 | 0.513892669 | 0.186112244 | 0.766584298  | 0.378780156  | 1.3631262    | 0.199353081  | 0.540682457  | 0.302168331  |
| Serpine1  | 0.070051641 | 0.079455422 | 0.06445689  | 0.057093921 | 0.134856104 | 0.041025361 | 19.52463069  | 5.725427076  | 7.759782214  | 1.208462328  | 4.151256462  | 3.760576871  |
| Sesn2     | 2.031517749 | 1.595236221 | 2.420462881 | 1.401010881 | 1.203343328 | 1.53294362  | 31.98021845  | 37.49662128  | 25.79292372  | 3.145131884  | 9.147927867  | 12.89315313  |
| Trem2     | 0           | 0.041510879 | 0.252562582 | 0.059656567 | 0.327613627 | 0.080375203 | 0.244696716  | 0.062316786  | 0.279170355  | 0.028697815  | 0.102898905  | 0.043498555  |
| Trpm2     | 0           | 0           | 0.020052565 | 0.011841295 | 0.041953789 | 0           | 0.097140217  | 0.061846622  | 0.134918163  | 0.011392519  | 0.034564558  | 0.025902221  |
| Trpv4     | 0.177638313 | 0.251855753 | 0.326902069 | 0.434339621 | 0.397540971 | 0.5266666   | 0.541453107  | 0.434803297  | 0.76588708   | 0.208939245  | 0.124862115  | 0.263915422  |
| Vcam1     | 0.081629511 | 0.092587513 | 0.131442641 | 0.207906837 | 0.542148903 | 0.080672419 | 1.958391603  | 0.634159362  | 1.197968012  | 0.568077618  | 0.4855015    | 0.81255006   |
| Vegfa     | 15.03868957 | 13.4399634  | 10.80577269 | 14.32269955 | 10.35645781 | 9.629920907 | 42.31666667  | 31.055654    | 23.69127077  | 15.50236549  | 12.87305658  | 17.83660521  |

**Table S10. Differentially expressed genes indicative of ER stress in pancreata of WT mice with or without CER-AP versus Hprt Tg mice with or without CER-AP**

| Gene name | WT3_NC_fpk  | WT4_NC_fpk  | WT5_NC_fpk  | TG1_NC_fpk  | TG4_NC_fpk  | TG5_NC_fpk  | WT1_CER_fpk | WT2_CER_fpk | WT3_CER_fpk | TG1_CER_fpk | TG2_CER_fpk | TG3_CER_fpk |
|-----------|-------------|-------------|-------------|-------------|-------------|-------------|-------------|-------------|-------------|-------------|-------------|-------------|
| Alox15    | 0           | 0.041832276 | 0.237550169 | 0           | 0.702900347 | 0.518384029 | 2.030751644 | 0.188397814 | 1.369963649 | 0           | 0.095719011 | 0.197259033 |
| Bbc3      | 1.704458008 | 1.111627737 | 1.097830724 | 0.83350673  | 1.107420038 | 0.935818626 | 5.999731986 | 4.788710546 | 3.222151186 | 2.338925975 | 1.843176814 | 2.785525386 |
| Bhlha15   | 93.20068101 | 137.7370425 | 94.36141899 | 67.36840809 | 36.78663    | 90.68002134 | 54.34172832 | 59.61043803 | 34.93092233 | 21.38840602 | 16.95264777 | 28.6478755  |
| Cebpb     | 1.384078834 | 3.071501479 | 3.543757536 | 1.667567654 | 3.614430507 | 3.594738185 | 45.82060856 | 77.5158047  | 55.80266113 | 19.29960503 | 28.16442801 | 41.12623494 |
| Chac1     | 44.94927523 | 28.28224719 | 30.93048727 | 13.33814435 | 3.67200731  | 12.62789195 | 788.1606402 | 949.6980755 | 546.6116404 | 43.18009648 | 55.02872499 | 178.4760846 |
| Ddit3     | 5.230686109 | 5.393506391 | 4.083699577 | 2.971283624 | 2.227511082 | 2.970494821 | 5.859965802 | 2.339080394 | 1.647161072 | 1.160041744 | 1.005580458 | 1.789725561 |
| Ern1      | 6.987610482 | 4.534315697 | 5.869118072 | 5.902671728 | 5.871047018 | 6.605329152 | 16.29767378 | 16.09352542 | 16.21124649 | 9.742811663 | 8.243675395 | 12.48402932 |
| Ero1lb    | 73.03931775 | 57.64682534 | 51.1586383  | 50.65893043 | 27.1368345  | 42.9623036  | 28.68881582 | 26.09413088 | 13.83312198 | 7.371119861 | 9.67987814  | 8.359339494 |
| Herpud1   | 297.473438  | 412.6497067 | 228.4174261 | 111.8337023 | 52.47186833 | 165.7279351 | 215.8962193 | 298.079178  | 128.6878932 | 66.07208799 | 46.46540513 | 109.3471162 |
| Lman1     | 27.52895094 | 21.55288116 | 22.238723   | 20.92952171 | 14.08059272 | 22.98030725 | 9.583372091 | 8.293206549 | 6.330186335 | 5.047914788 | 3.847124878 | 4.631079633 |
| Nhlrc1    | 0.157814682 | 0.268499751 | 0.25411862  | 0.289401966 | 0.432926892 | 0.346587404 | 0.993092945 | 2.082559623 | 1.727213791 | 1.051861242 | 0.529041561 | 0.867515531 |
| Nrbf2     | 3.016890675 | 3.145922088 | 3.313222771 | 3.608949705 | 3.091249913 | 2.949458807 | 23.08010072 | 21.4178941  | 14.00787831 | 10.72176601 | 6.966851615 | 11.16203316 |
| Ppp1r15a  | 2.095490969 | 2.446696748 | 2.268390932 | 2.235313504 | 0.783074544 | 2.788299795 | 49.47347203 | 36.20547987 | 10.40421722 | 4.37368577  | 6.838091846 | 16.3903428  |
| Rnf5      | 10.74118865 | 10.59098446 | 9.714865988 | 6.764724885 | 4.229552998 | 8.953266437 | 2.97634911  | 6.338957613 | 3.926685858 | 2.10564171  | 1.082341266 | 2.139832645 |
| Sesn2     | 2.031517749 | 1.595236221 | 2.420462881 | 1.401010881 | 1.203343328 | 1.53294362  | 31.98021845 | 37.49626128 | 25.79292372 | 3.145131884 | 9.147927867 | 12.89315313 |
| Trib3     | 2.001795695 | 2.31882703  | 2.390577142 | 0.867827596 | 0.66413934  | 0.97279337  | 47.77425497 | 60.04827917 | 36.27451916 | 14.52791439 | 18.0177863  | 36.27072229 |

**Table S11. Primers for qRT-PCR analysis.**

|            |   |                         |
|------------|---|-------------------------|
| 5s rRNA    | F | TCTACGGCCATACCACCCTGAA  |
|            | R | CCAAGTACTAACCAAGGCCCGA  |
| mAmylase 2 | F | TGGCGTCAA ATCAGGAACATG  |
|            | R | AAAGTGGCTGACAAAGCCCAG   |
| mAsc       | F | GCTACTATCTGGAGTCGTATGGC |
|            | R | GACCCTGGCAATGAGTGCTT    |
| mBip       | F | ACTTGGGGACCACCTATTCCT   |
|            | R | ATCGCCAATCAGACGCTCC     |
| mCaspase-1 | F | ACAAGGCACGGGACCTATG     |
|            | R | TCCCAGTCAGTCCTGGAAATG   |
| mCcl3      | F | TGTACCATGACACTCTGCAAC   |
|            | R | CAACGATGAATTGGCGTGGAA   |
| mCcl4      | F | TGTCTGCCCTCTCTCTCCTC    |
|            | R | TTGGAGCAAAGACTGCTGGT    |
| mCcl7      | F | CCAATGCATCCACATGCTGC    |
|            | R | CTCGACCCACTTCTGATGGG    |
| mChop      | F | CTGGAAGCCTGGTATGAGGAT   |
|            | R | CAGGGTCAAGAGTAGTGAAGGT  |
| mCpa1      | F | GCCACGGTAAGTTTCTGAGCA   |
|            | R | ACACCCACAAAACGAATCGC    |
| mCxcl10    | F | AAGTGCTGCCGTCATTTTCT    |
|            | R | CCTATGGCCCTCATTCTCAC    |
| mEif2s1    | F | ACAAACTGATCCGAATTGGCAG  |
|            | R | TGCTTCCTCTGGAGAACTCT    |
| mEnpp2     | F | GGCTGTTTCGGGTCATACCA    |
|            | R | TGGGAGGTCCTTCATCCCAT    |

|               |   |                         |
|---------------|---|-------------------------|
| mErn1         | F | CAATCGTACGGCAGTTGGAG    |
|               | R | CTCCCGGTAGTGGTGTCTTCT   |
| mEro11b       | F | ACCCTGAGCTTCCTCTCAAGT   |
|               | R | AAAGGACATGGTCGTTTCAGATT |
| mIl-1 $\beta$ | F | AAATACCTGTGGCCTTGGGC    |
|               | R | CTTGGGATCCACACTCTCCAG   |
| mIl-6         | F | CCAGAGATACAAAGAAATGATGG |
|               | R | ACTCCAGAAGACCAGAGGAAAT  |
| mLman1        | F | GATGGGACCGTGCCCTTTT     |
|               | R | GCTTTTTAATGACGGCGCTATTC |
| mNlrp3        | F | ATCAACAGGCGAGACCTCTG    |
|               | R | GTCCTCCTGGCATAACCATAGA  |
| mRbpjl        | F | ACTCCGGTGCCTCTCATCAG    |
|               | R | CTACGCACACCAAGGAACGA    |
| mS100a8       | F | CAGCTGACACTTAGCCTCACA   |
|               | R | TTCTCCAGTTCAGACGGCAT    |
| mTrpc1        | F | ATCATCGGCCAAAACGATCAT   |
|               | R | GCAGCTAAAATAACAGGTGCGA  |
| mTrpc3        | F | GCATACTTGTCGCTGTCCAG    |
|               | R | TCCAGCACACCCACTACGAA    |
| mTrpc6        | F | AGCCAGGACTATTTGCTGATGG  |
|               | R | AACCTTCTTCCCTTCTCACGA   |

**Table S12. Luciferase genes 3'UTR primers.**

|            |   |                                         |
|------------|---|-----------------------------------------|
| mTRPC3     | F | CCGCTCGAGGGCAGCCACCTGCAGTCAA            |
| -3'UTR     | R | GGACTAGTCAGCGTTTGGATGAGAACGTATGC        |
| mTRPC3     | F | GTATGAAATATCTAGAAAACCTATGGTGTAGAGCTCTAG |
| -3'UTR-mut | R | TTAGGAGTATTATTGCC                       |
| mTRPC6     | F | CCGCTCGAGAGCAGAGCCCCTCAGAAGTG           |
| -3'UTR     | R | GGACTAGTCAGCAATTGTTAGCCTCAGCAATGC       |
| mTRPC6     | F | TAGGCCATATTATTTTCTGACTTATTTTTTTAAG      |
| -3'UTR-mut | R | GATAGGAGAAATAAATATGCACTTC               |
